# Supplementary material
Source: PubMed Central journal article supplement (PMC10074972)
Supplement: mmc1.pdf [file mmc1.pdf]

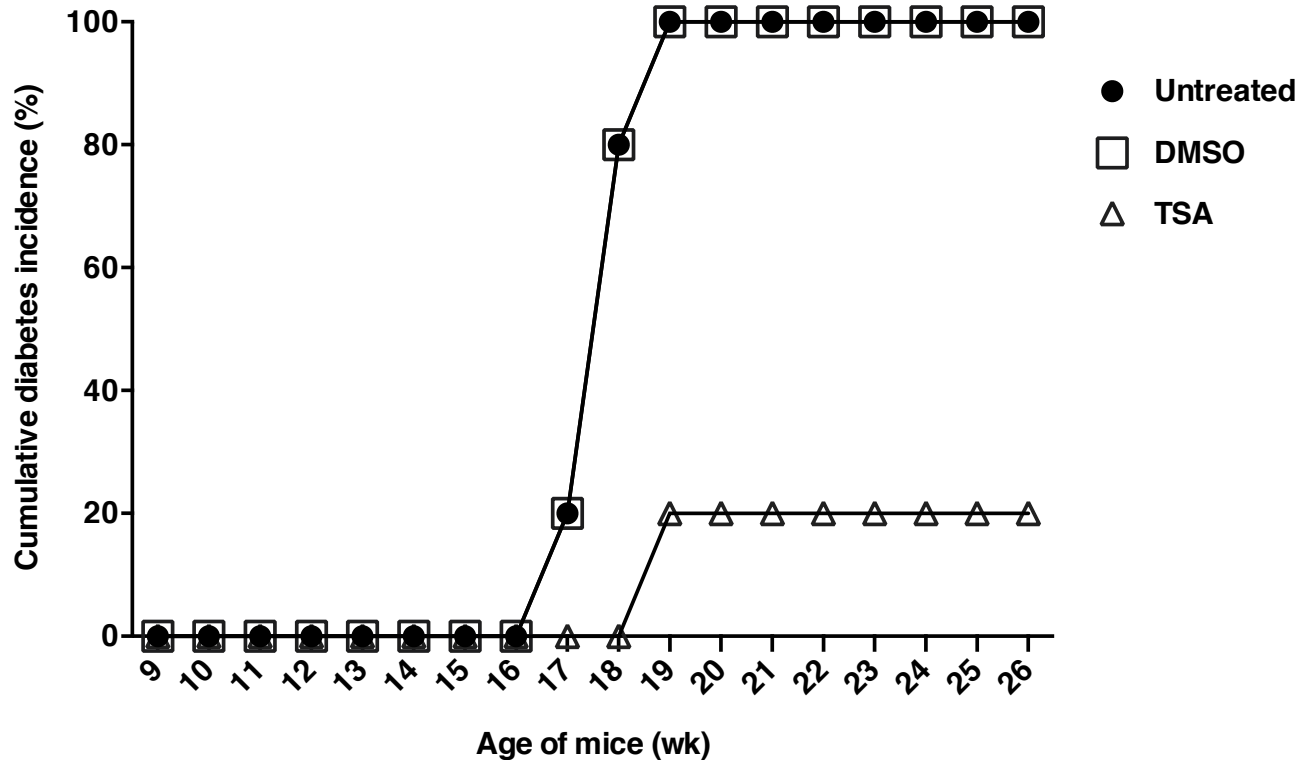

**Supplementary Fig. 1 Abrogation of T1D by TSA treatment.** Female NOD mice were treated with TSA between 16 and 24-wks of age. Controls received DMSO or left untreated. Blood glucose levels were monitored weekly, and  $>250$  mg/dL at two consecutive weeks were considered diabetic. Five mice per group were tested in three different experiments, and the cumulative data are shown. The difference between controls (untreated and DMSO-treated mice) and those treated with TSA was statistically significant,  $P < 0.05$ , as assessed by Wilcoxon Signed Rank Test.

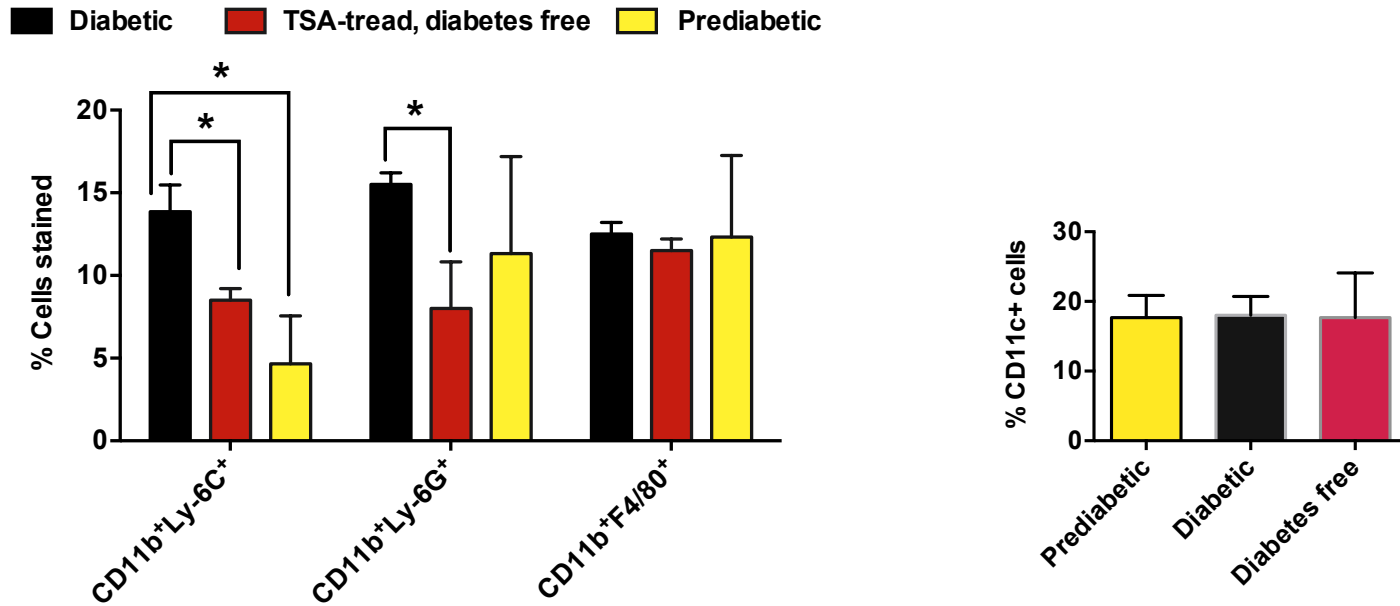

**Supplementary Fig. 2. Determination of splenic accessory cell populations by flow cytometry.** Diabetic NOD mice and those treated with TSA between 16 and 24 weeks of age were analyzed during 24-28 wks of age. Splenocytes were stained with fluoresceinated anti-CD11b, anti-Ly-6C and anti-F4/80 antibodies. Cells were gated on CD11b<sup>+</sup> cells and analyzed for the expression of Ly-6C or F4/80. Viable splenocyte were analyzed for the expression of CD11c. n=5-10 per group; \*P=<0.05.
